# Supplementary material for: Metabolism of Selected 2-Arylbenzofurans in a Colon In Vitro Model System
Source: MDPI journal article supplement (doi:10.3390/foods10112754), 2021-11-10
Supplement: s1 [file s1]

## Supplementary Materials

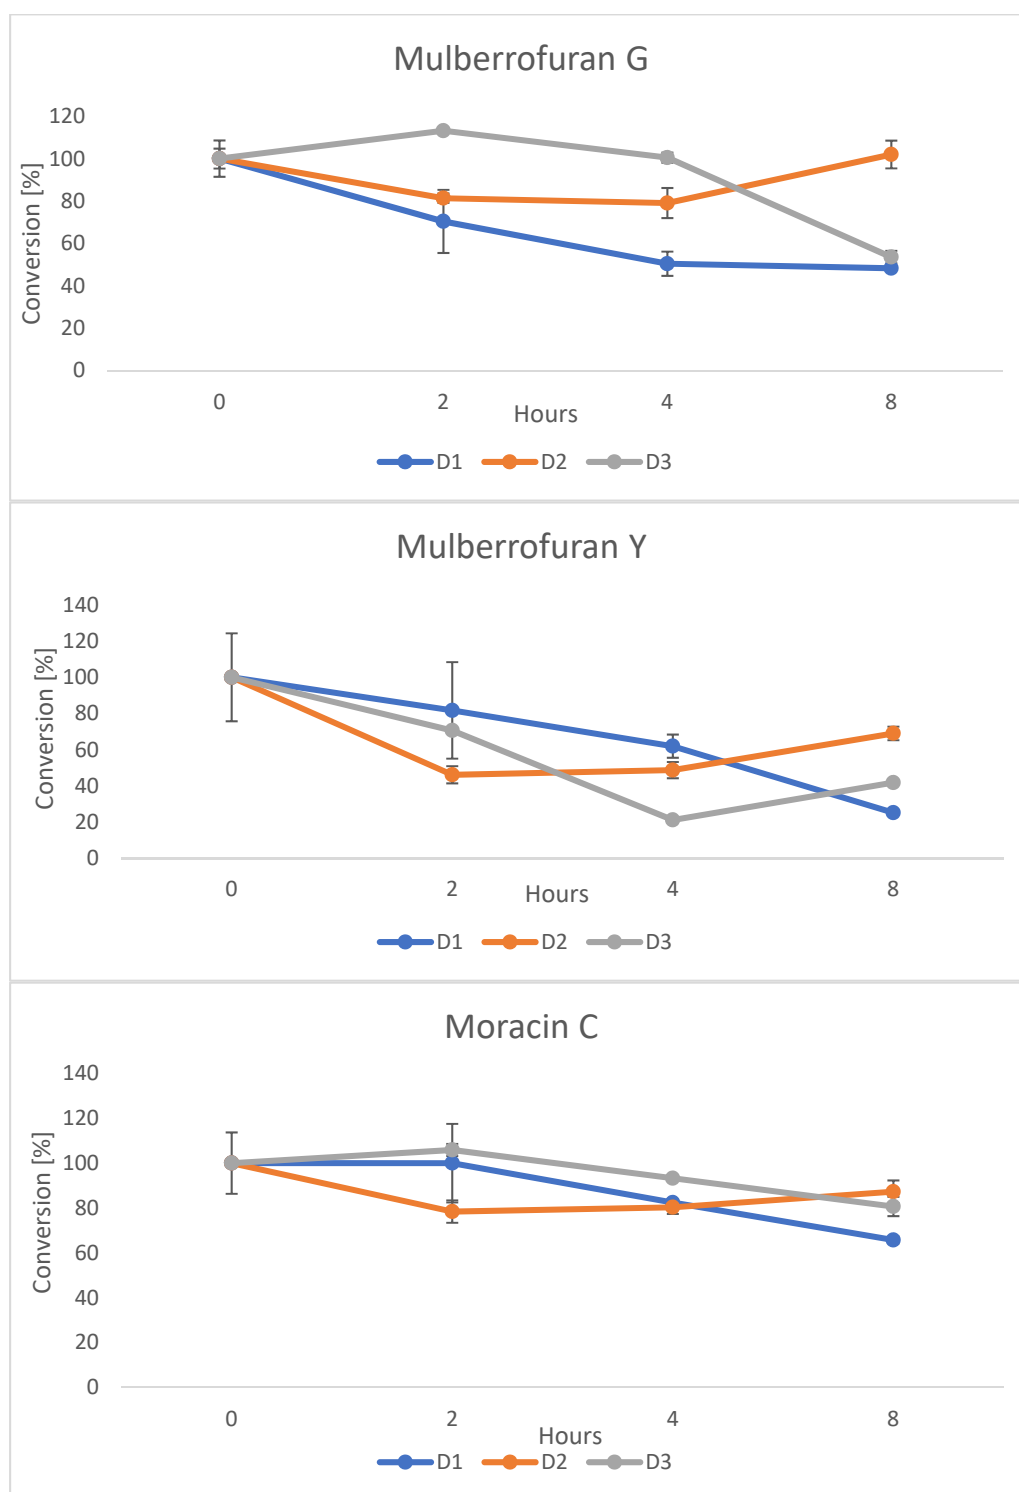

**Figure S1.** Conversion of 2-arylbenzofurans during *in vitro* batch fermentation with human fecal suspensions. Human fecal cultures consisted of 10% human fecal suspensions in medium containing 10  $\mu\text{g/mL}$  of the compound and incubated for 8 h at 37  $^{\circ}\text{C}$  under anaerobic conditions. Values shown are arithmetic means ( $\pm\text{SDs}$ ), conducted in triplicate. Curves are given for each subject. A: degradation of mulberrofuran G, B: decomposition of mulberrofuran Y, C: degradation of moracin C.

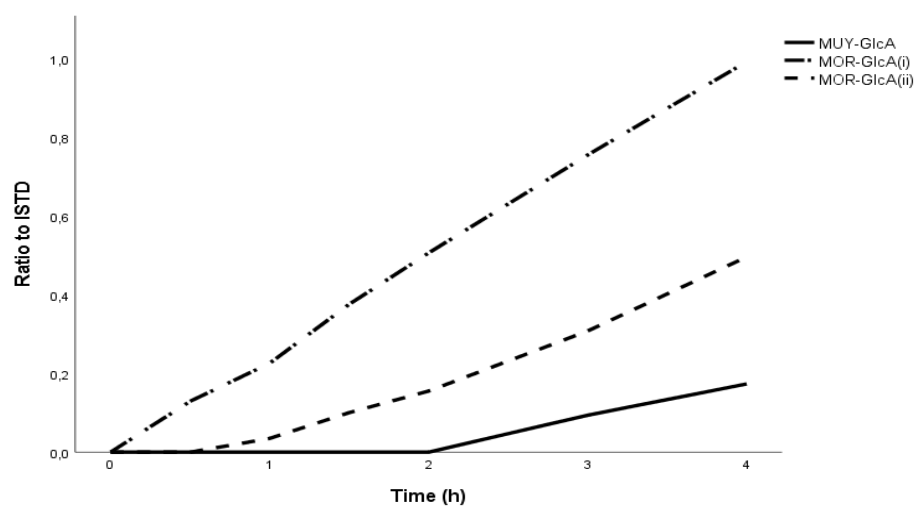

**Figure S2.** Monitored trends in metabolites on the basolateral side of inserts in the Transwell™ cell system. Values obtained from LC/MS for MUY-GlcA, MOR-GlcA(i) and MOR-GlcA(ii) are expressed as mean intensity  $\pm$  standard deviation,  $n = 3$ .
